# Supplementary material for: Tunneling nanotubes between bone marrow stromal cells support transmitophagy and resistance to apoptosis in myeloma
Source: PubMed Central journal article supplement — Blood Cancer J. 2025 Jan 9;15(1):3. doi: 10.1038/s41408-025-01210-2 (PMC11717949; doi:10.1038/s41408-025-01210-2), 2025-01-09
Supplement: 41408_2025_1210_MOESM1_ESM.pdf [file 41408_2025_1210_MOESM1_ESM.pdf]

## JJN3 Mito + BMSCs

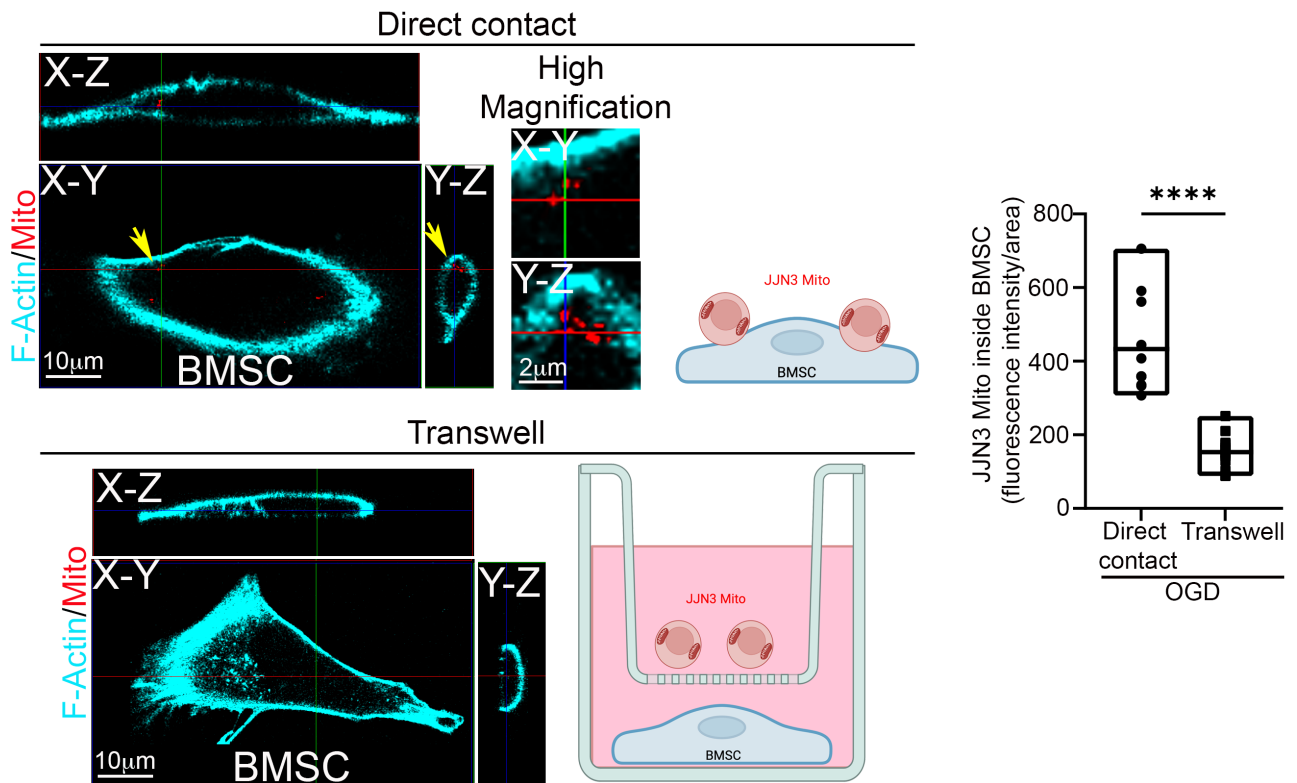

### Supplementary Fig. 1:

#### The Transfer of Mitochondria from JJN3 to BMSCs Occurs Through Direct Contact

Representative confocal images and quantification of Mitotracker Deep Red signal within BMSCs in direct-contact and non-contact co-culture (Transwell) with JJN3 cells stained with Mitotracker Deep Red (JJN3 Mito). The quantification demonstrates that mitochondrial transfer occurs exclusively through direct contact, with no evidence of passive dye diffusion.
