# Supplementary material for: Tunneling nanotubes between bone marrow stromal cells support transmitophagy and resistance to apoptosis in myeloma
Source: PubMed Central journal article supplement — Blood Cancer J. 2025 Jan 9;15(1):3. doi: 10.1038/s41408-025-01210-2 (PMC11717949; doi:10.1038/s41408-025-01210-2), 2025-01-09
Supplement: 41408_2025_1210_MOESM2_ESM.pdf [file 41408_2025_1210_MOESM2_ESM.pdf]

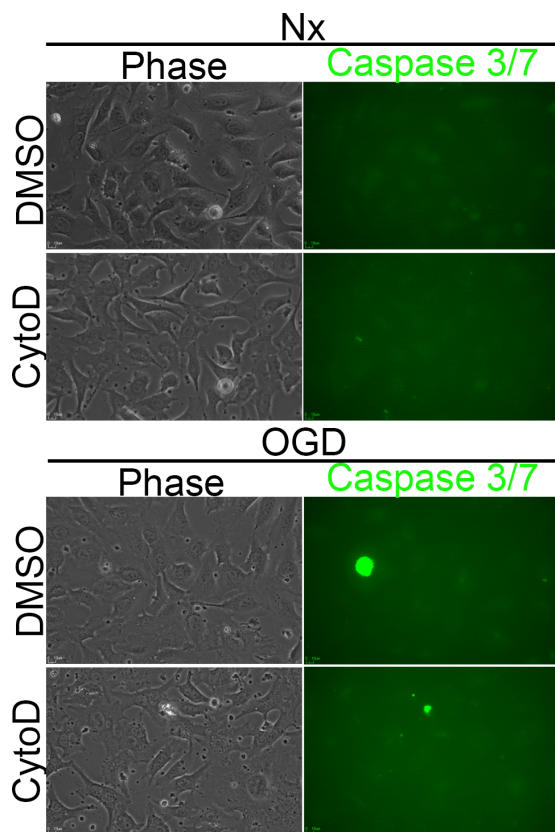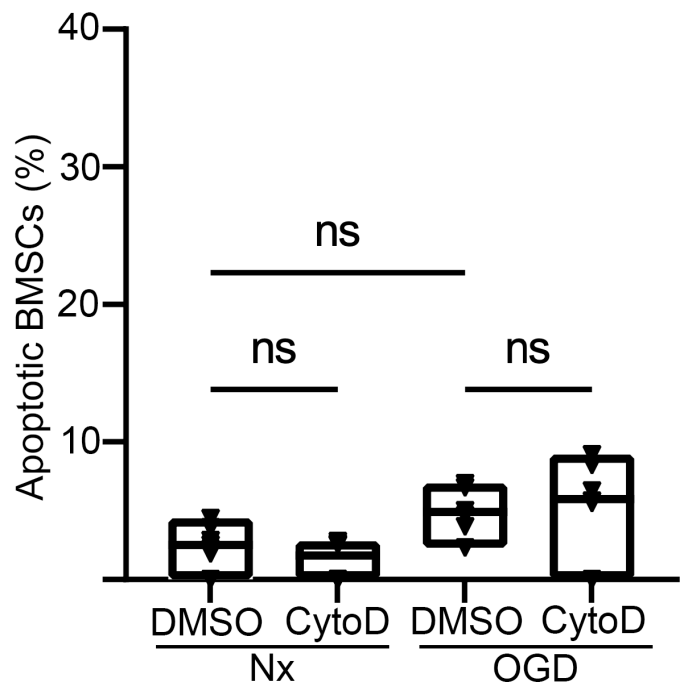

**Supplementary Fig. 2: Evaluation of Cytochalasin-D Toxicity on BMSCs**

BMSCs pretreated with 0.5  $\mu$ M Cytochalasin-D for 24 hours showed no signs of apoptosis, as evaluated by Caspase 3/7 activity (green).
